# Supplementary material for: Renal glomerular and tubular injury in the offspring of the preeclampsia-like syndrome
Source: PubMed Central journal article supplement — Sci Rep. 2025 Jan 6;15:915. doi: 10.1038/s41598-025-85258-x (PMC11704207; doi:10.1038/s41598-025-85258-x), 2025-01-06
Supplement: 41598_2025_85258_MOESM1_ESM.pdf [file 41598_2025_85258_MOESM1_ESM.pdf]

## Supplementary materials

### Title:

**Renal glomerular and tubular injury in the Offspring of the Preeclampsia-Like Syndrome**

### Authors:

Yong Wang<sup>1#</sup>, Hao Wang<sup>1#</sup>, Huiqing Lu<sup>1</sup>, Ji Ma<sup>1</sup>, Wei Wu<sup>1</sup>, Yinan Wang<sup>1</sup>, Bo Ma<sup>1</sup>, Hao Zhu<sup>1\*</sup>, Rong Hu<sup>1\*</sup>

### Correspondence:

irios@126.com; hurong@fudan.edu.cn

### Affiliation:

<sup>1</sup>The Obstetrics and Gynecology Hospital of Fudan University

Fig 3 AQP Control

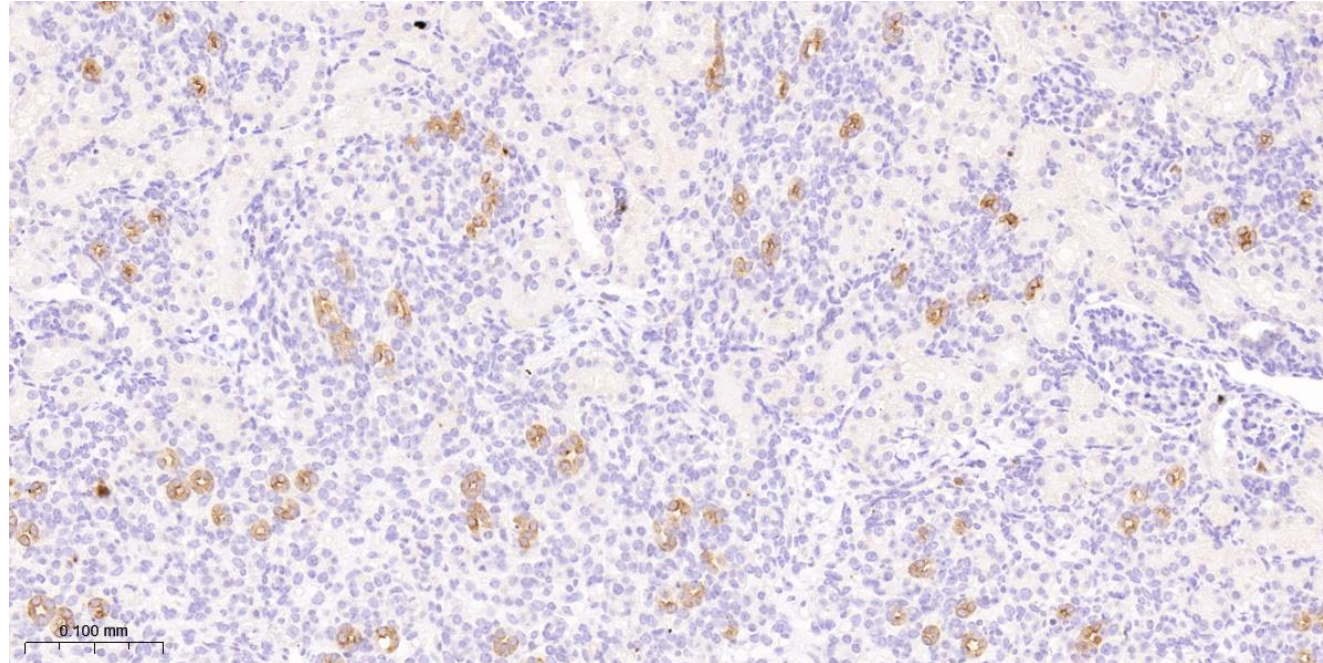

Fig 3 AQP LAME

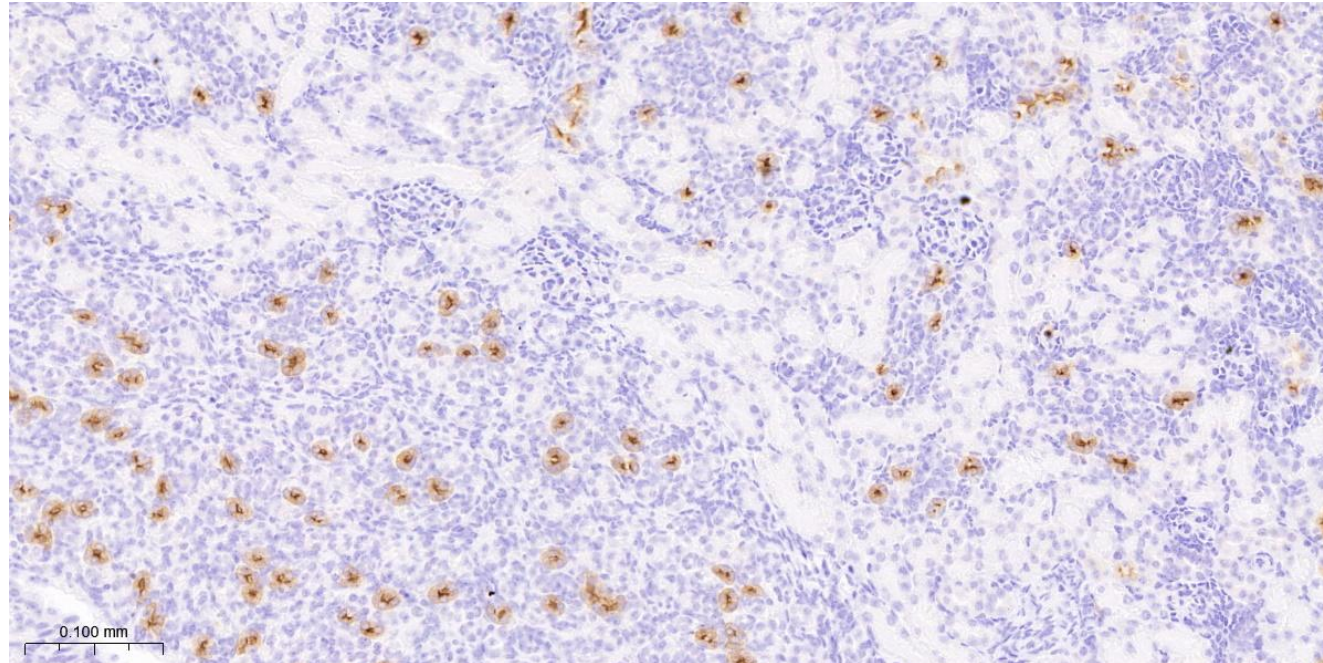

Fig 4 AQP control female

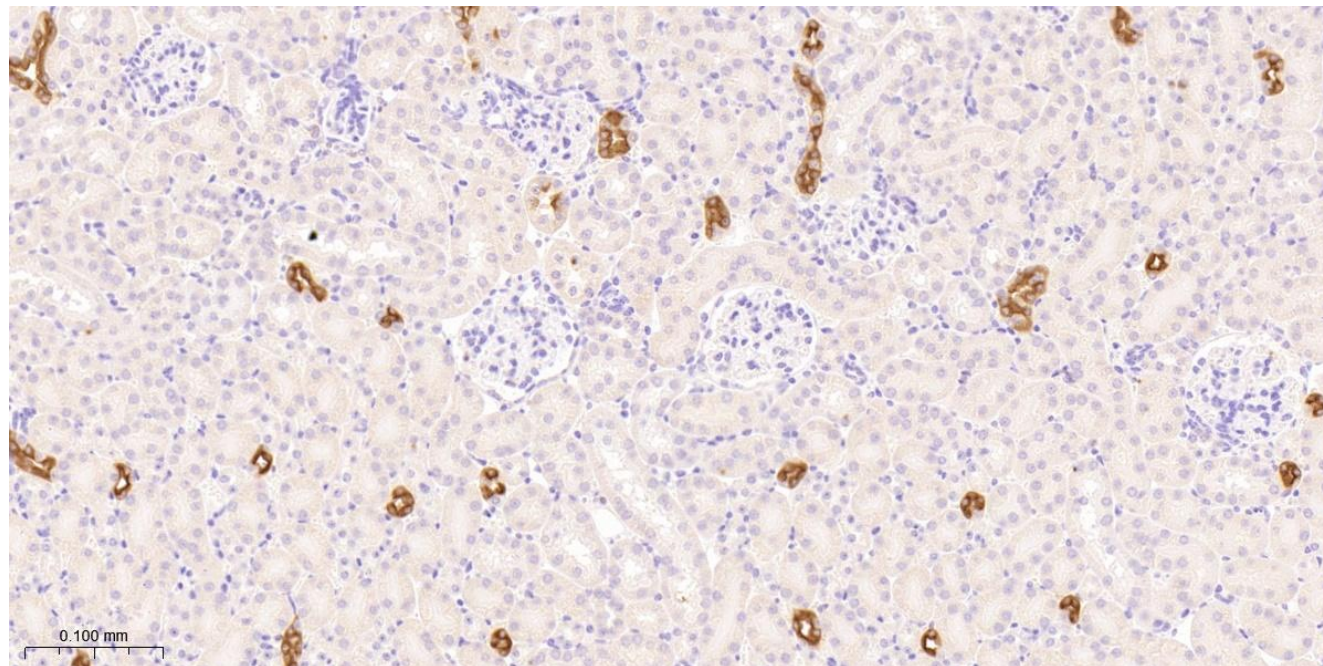

Fig 4 AQP control male

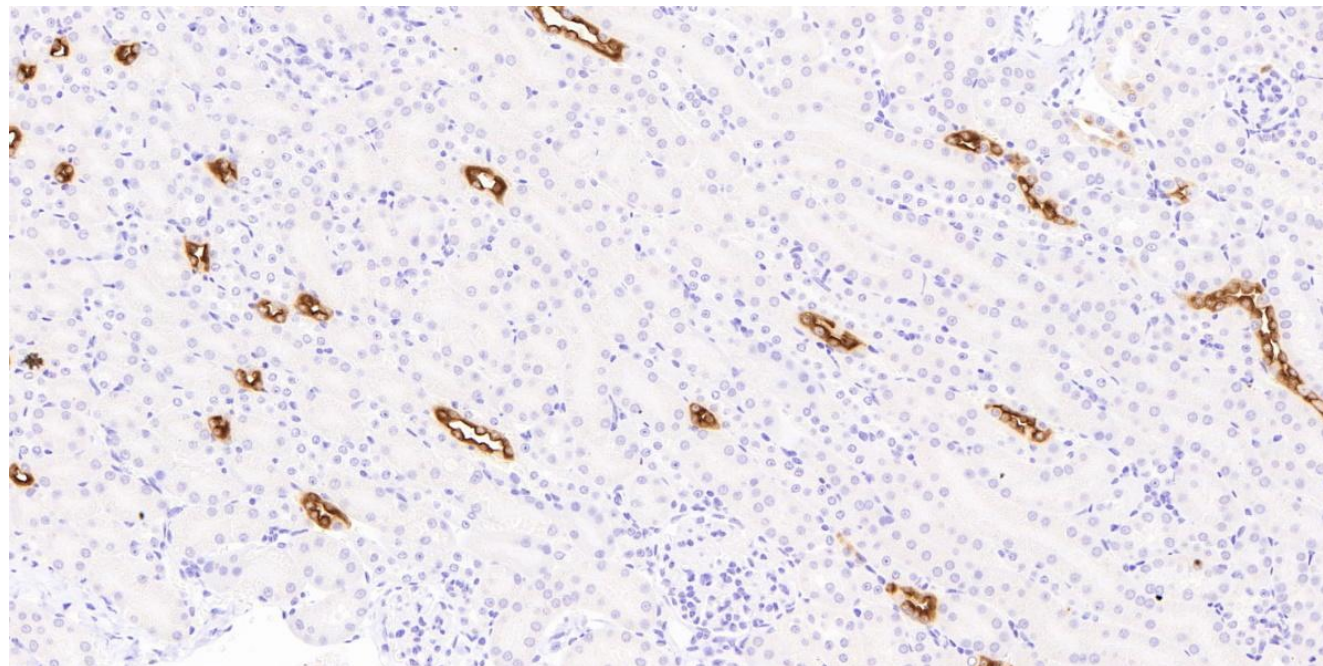

Fig 4 AQP LAME female

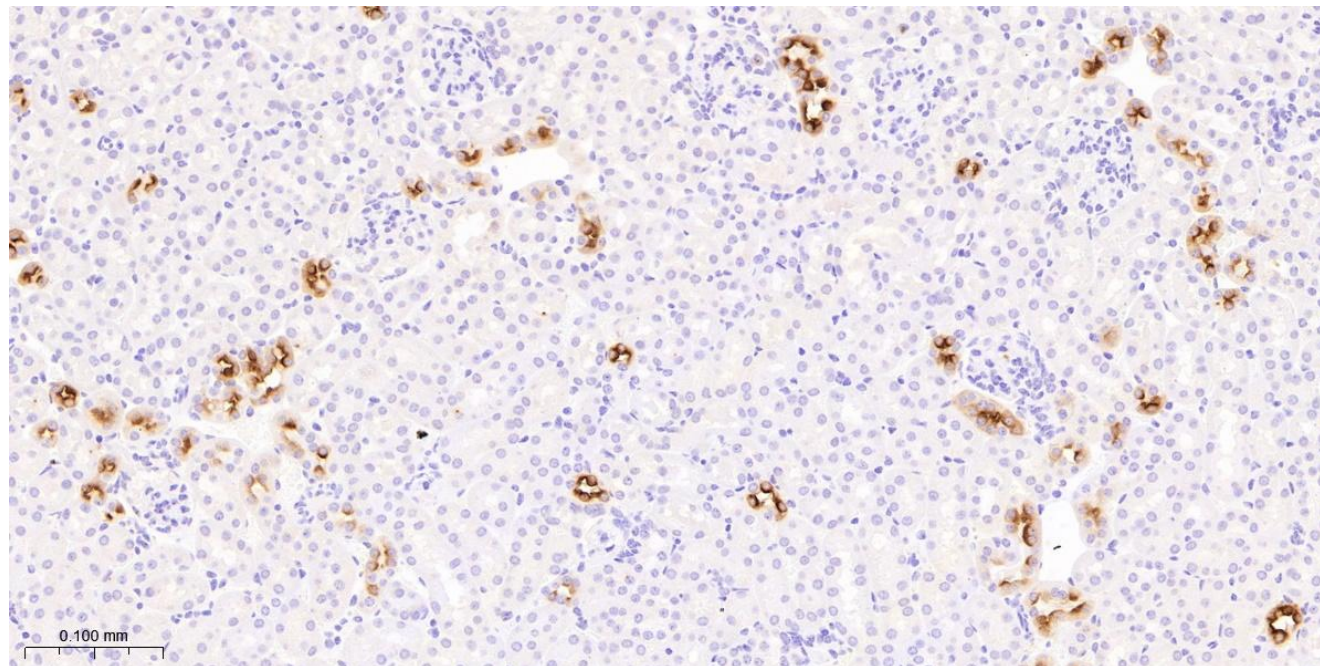

Fig 4 AQP LAME male

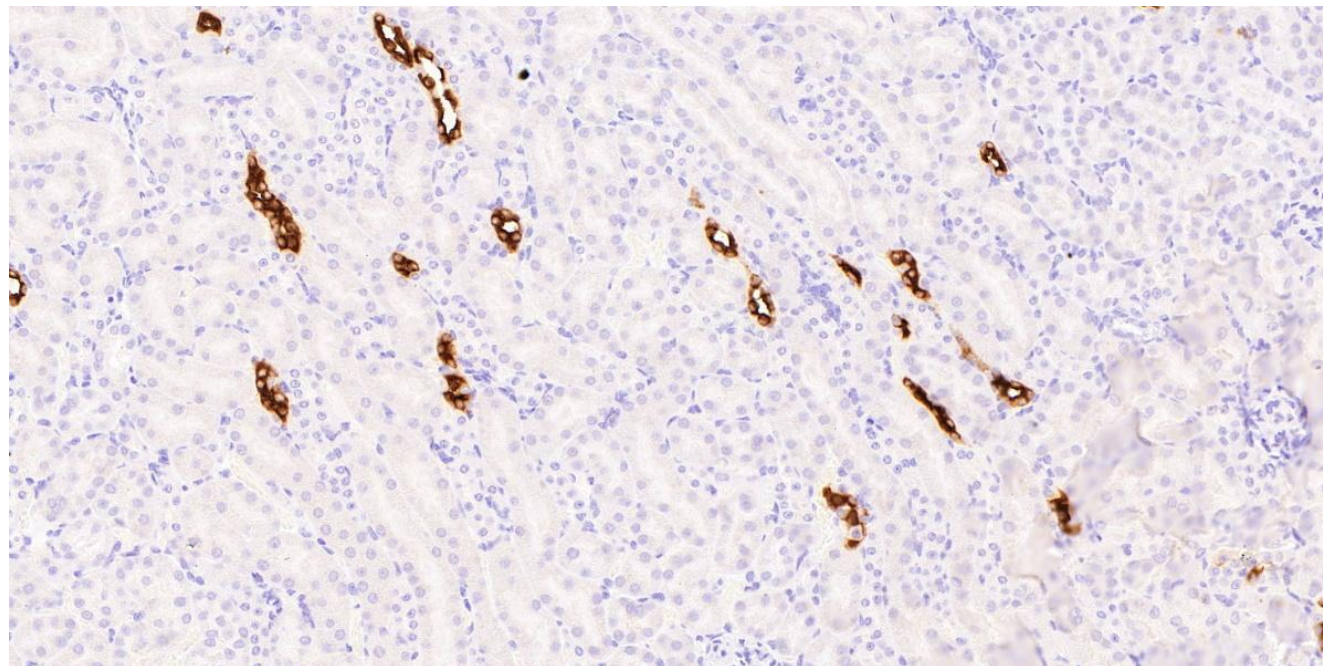

Fig 3 AT1R control

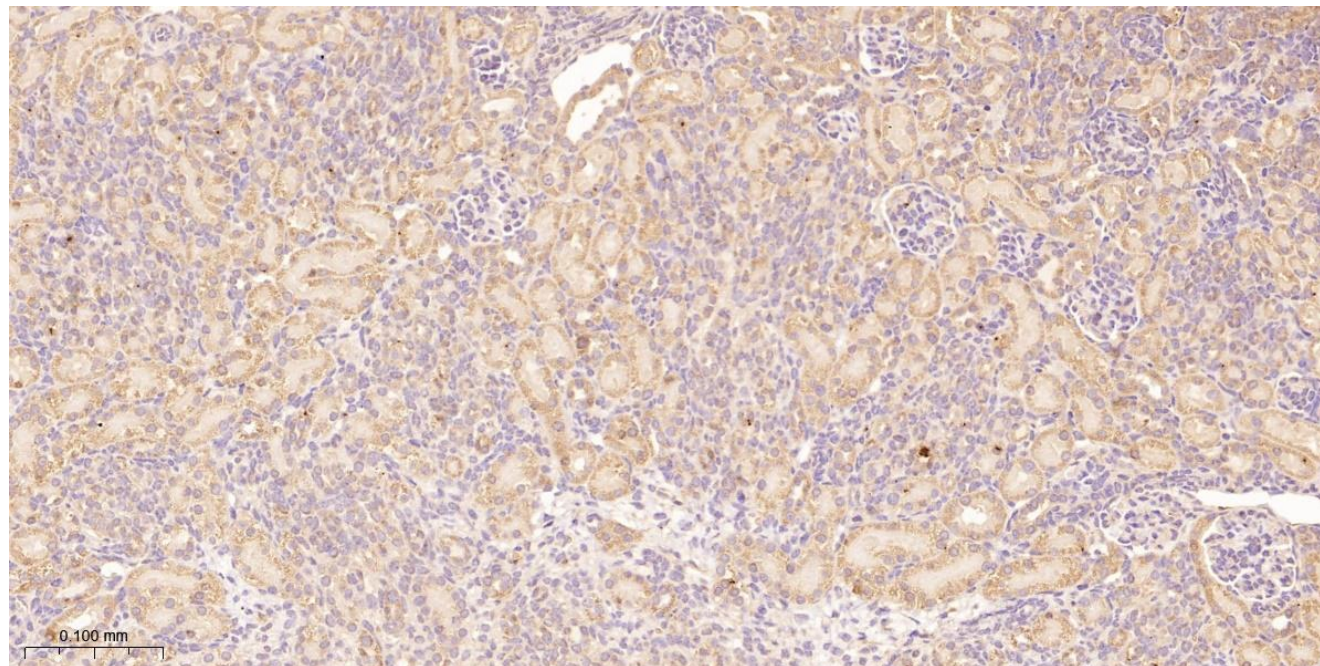



Fig 3 AT1R LAME

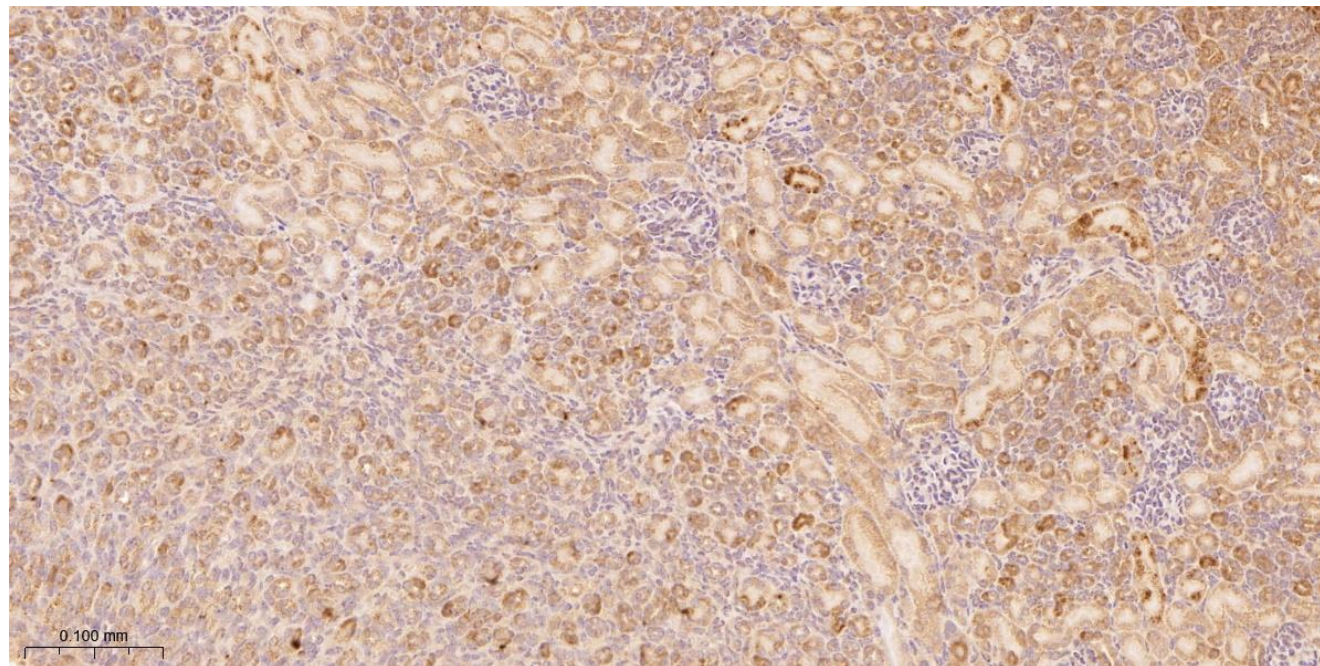

Fig 4 AT1R control female

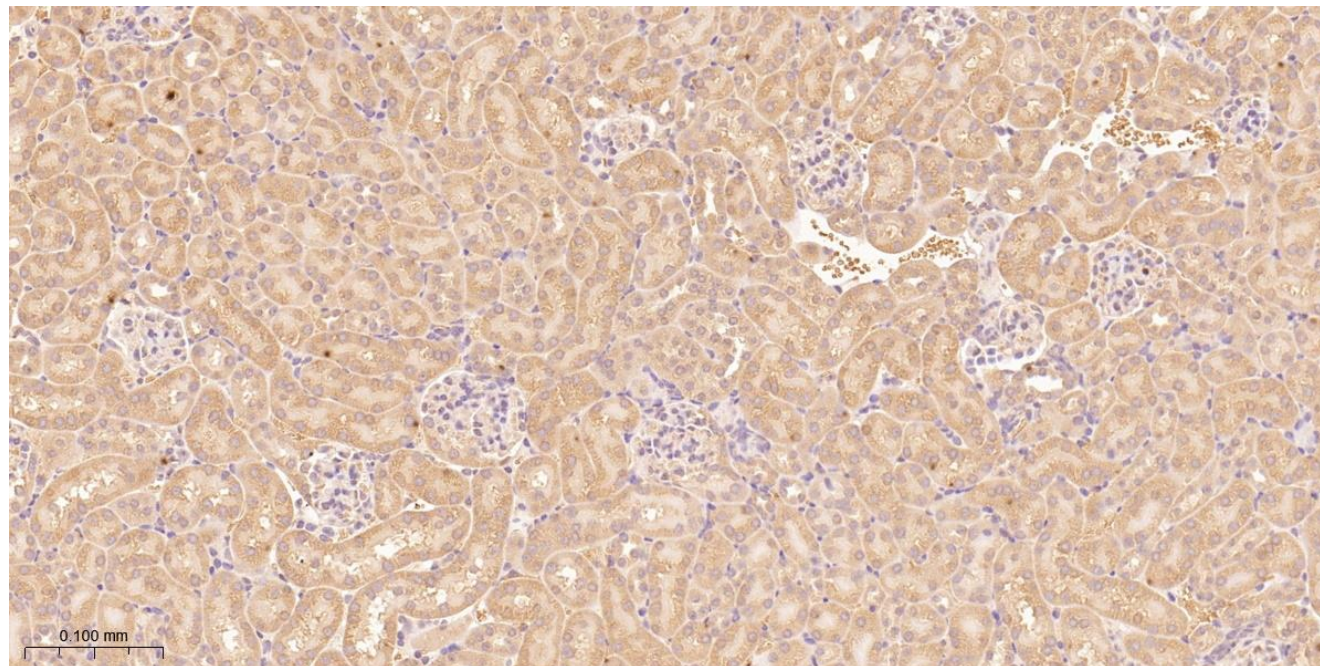

Fig 4 AT1R control male

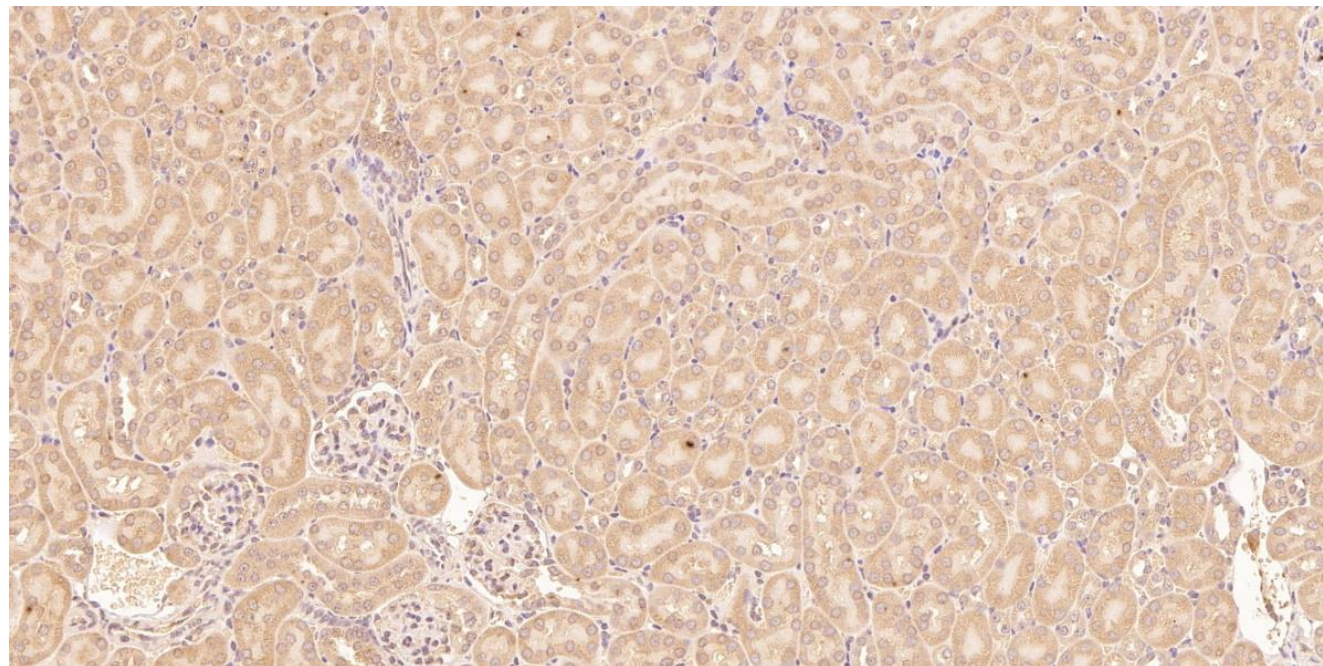

Fig 4 AT1R LAME female

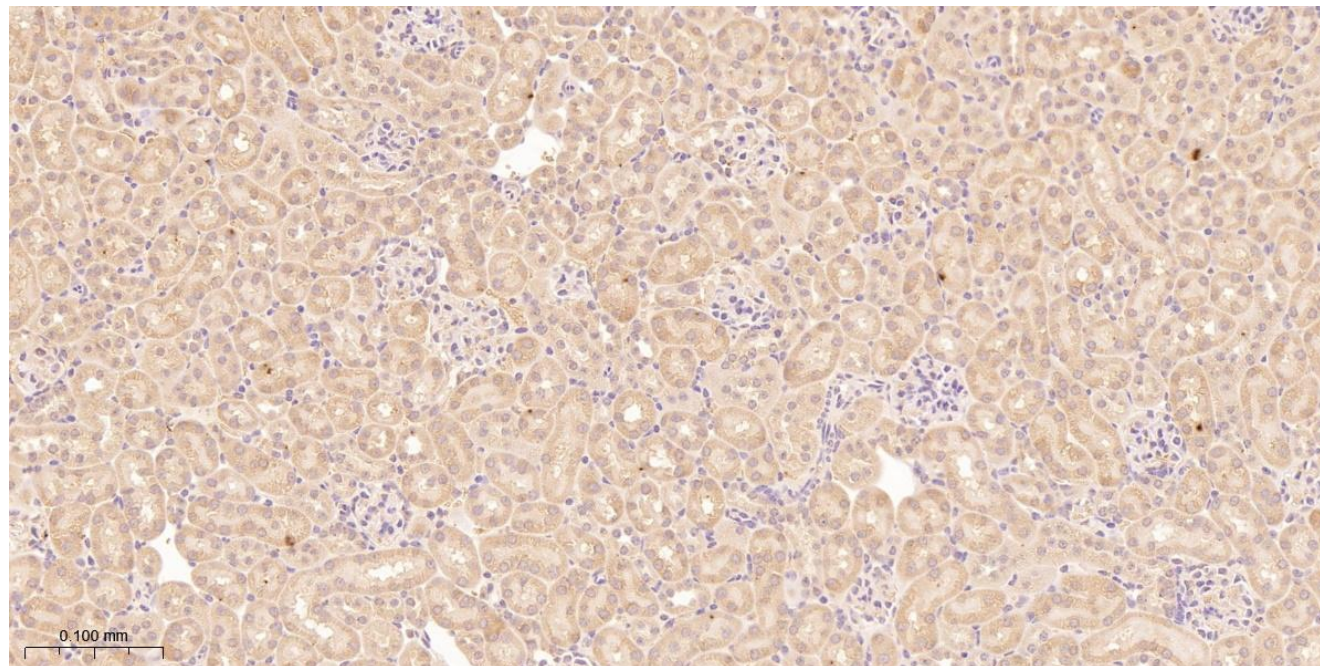

Fig 4 AT1R LAME male

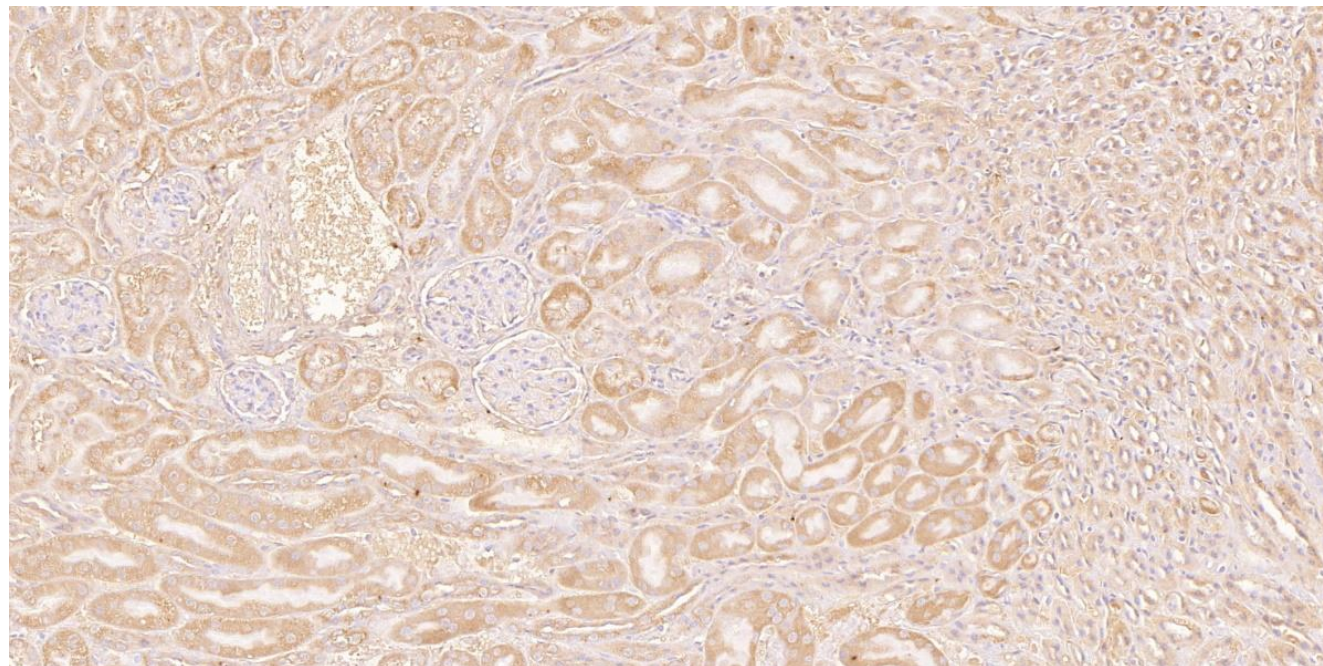

Fig 3 ENAC control

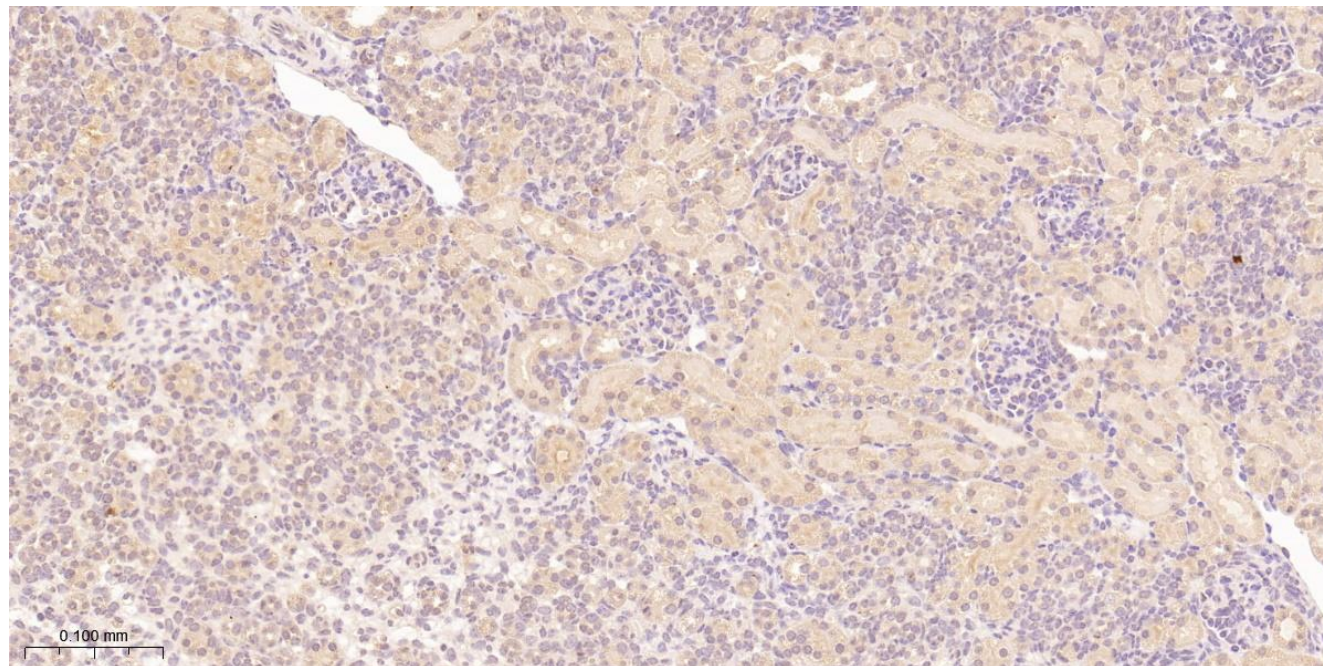

Fig 3 ENAC LAME

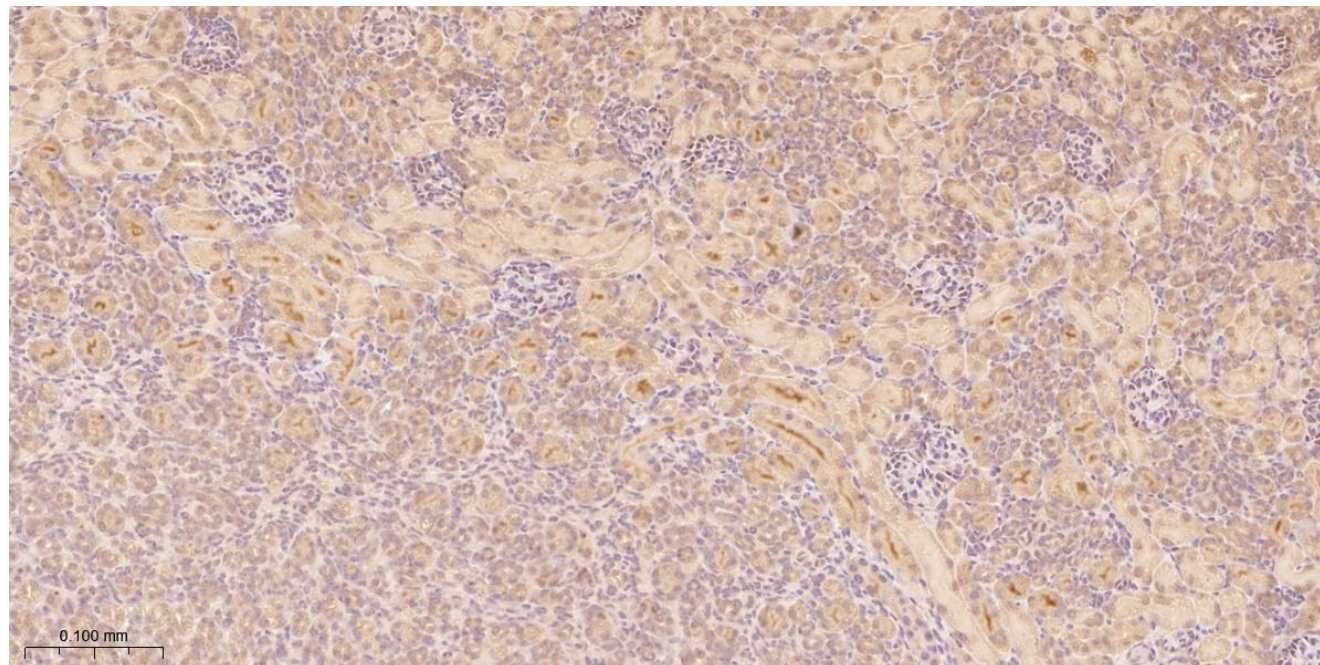

Fig 4 ENAC control female

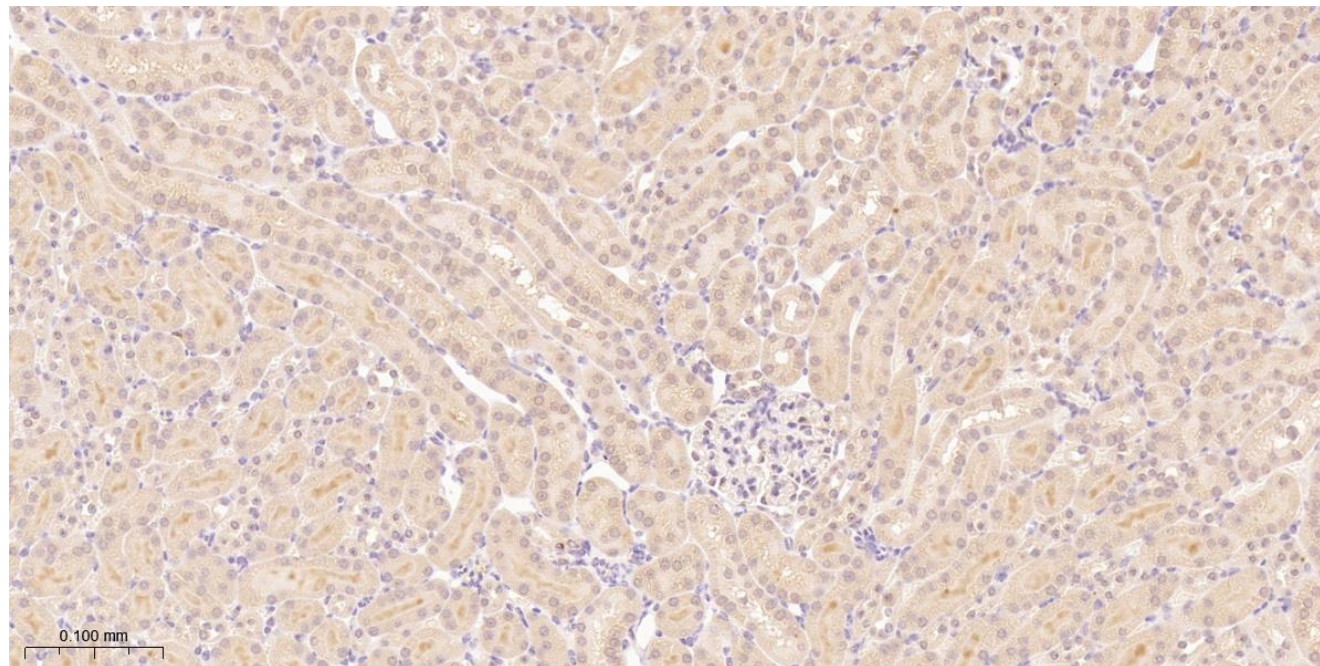



Fig 4 ENAC control male

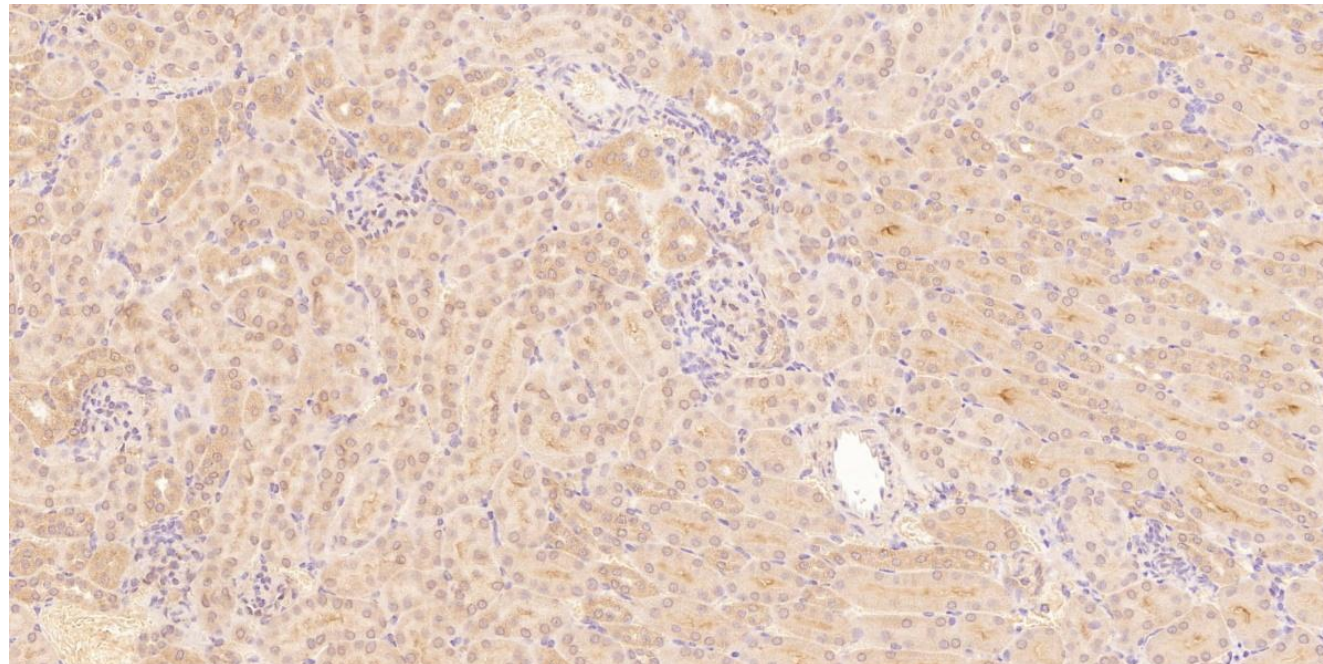

Fig 4 ENAC LAME female

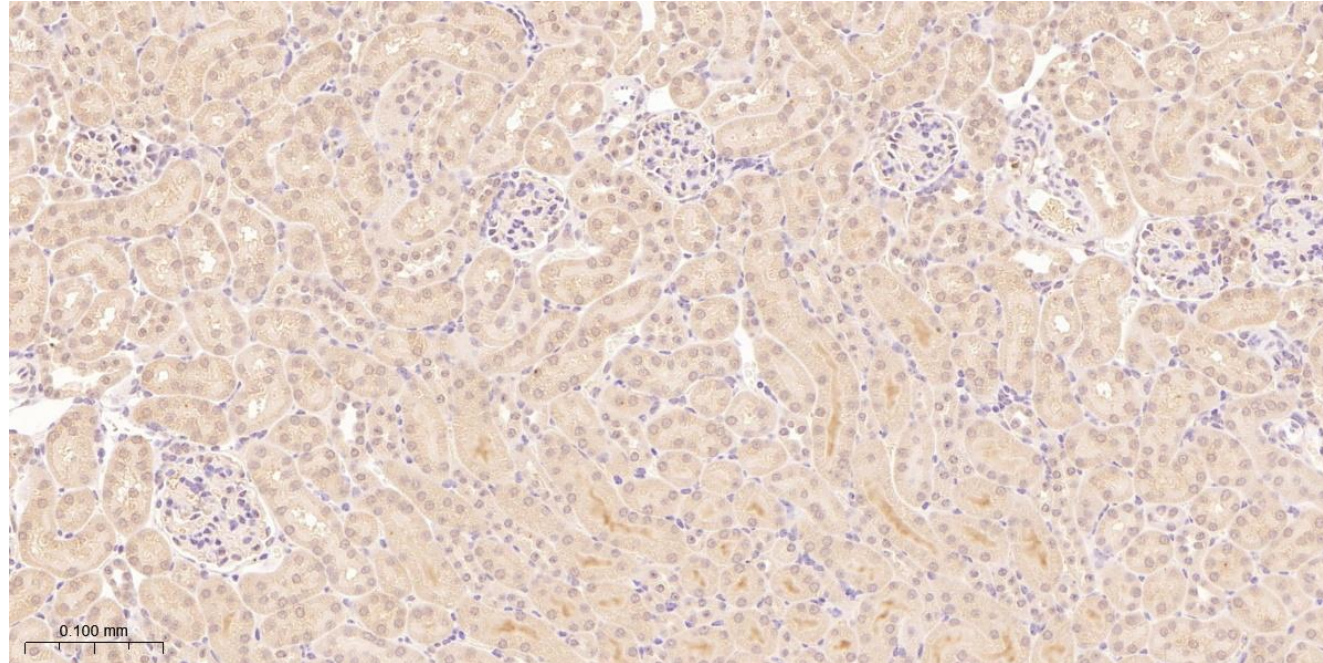

Fig 4 ENAC LAME male

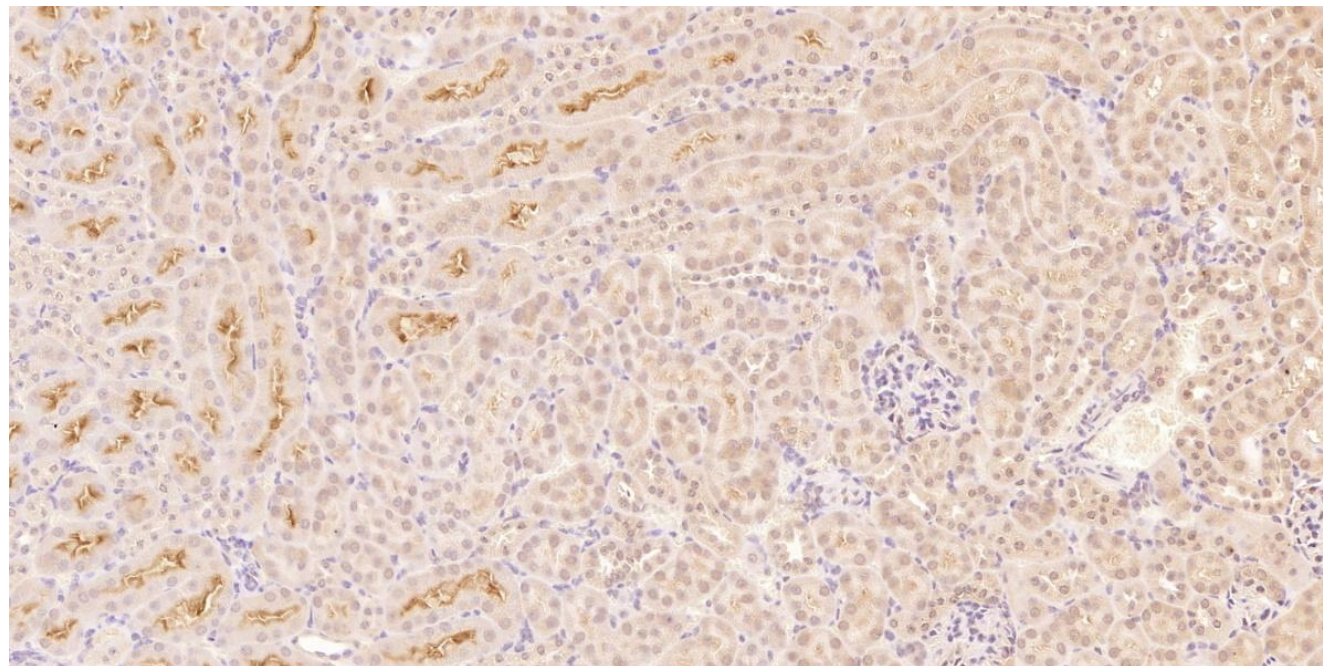

Fig 3 GRK LAME

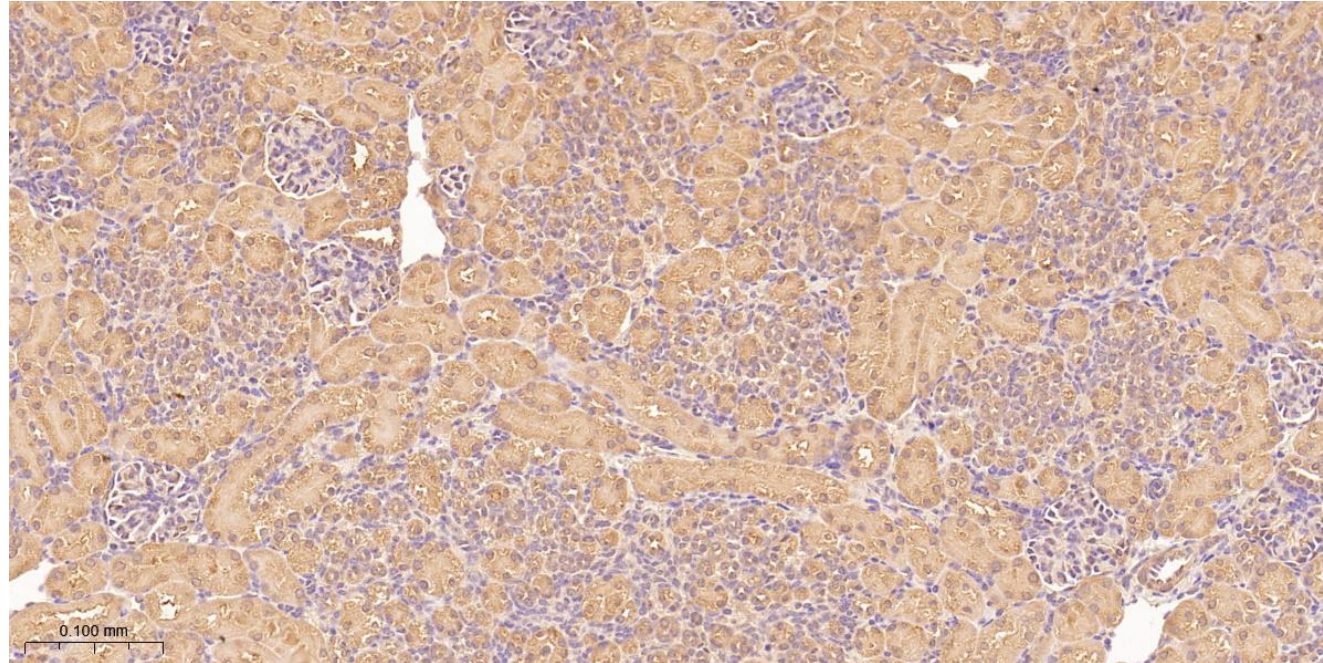

Fig 3 GRK control

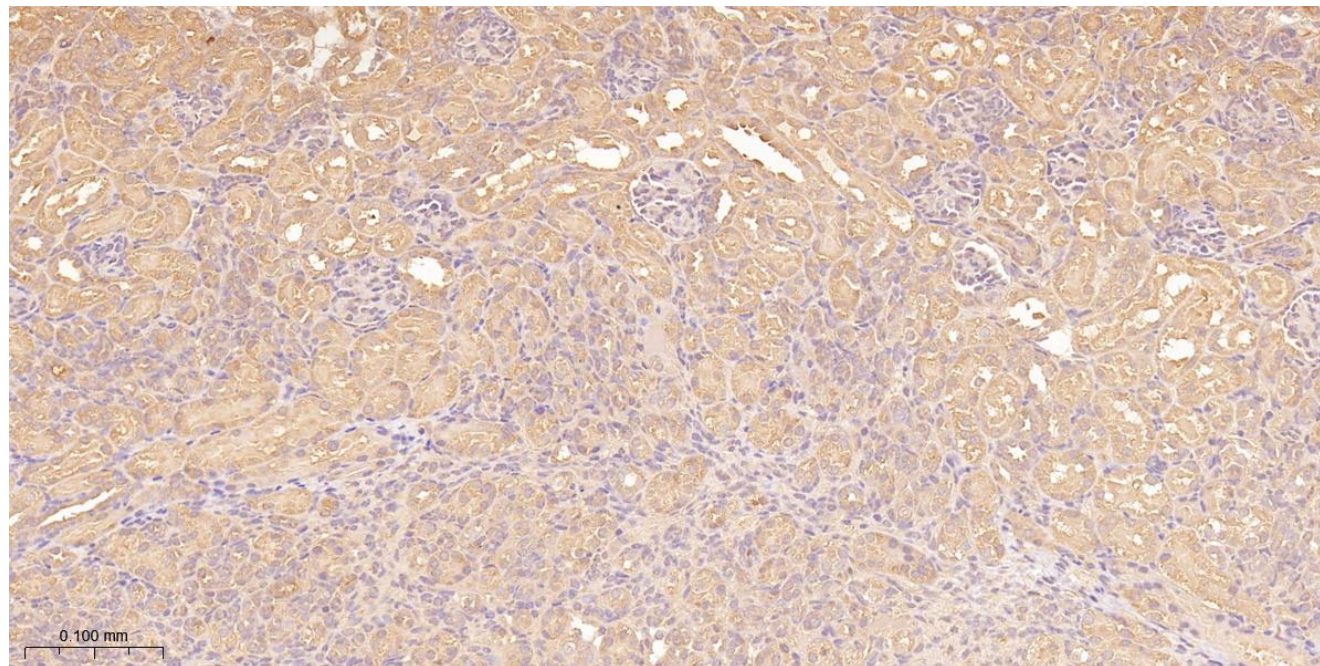

Fig 4 GRK control female

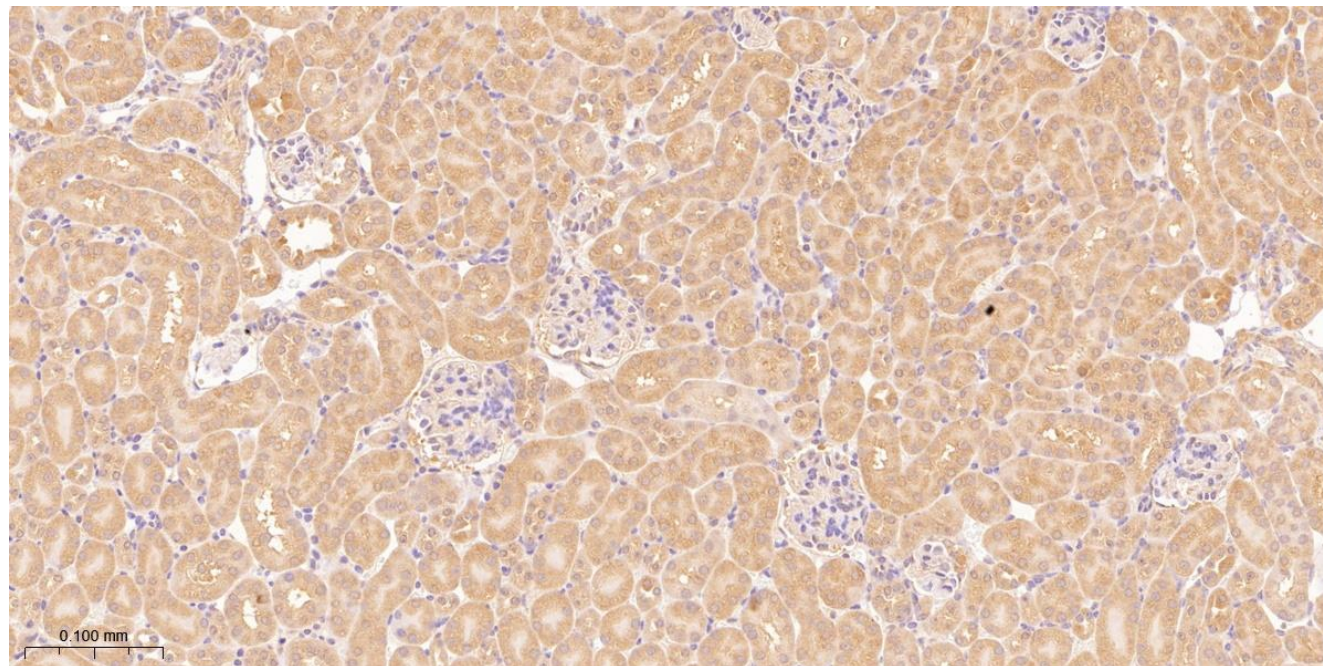

Fig 4 GRK control male

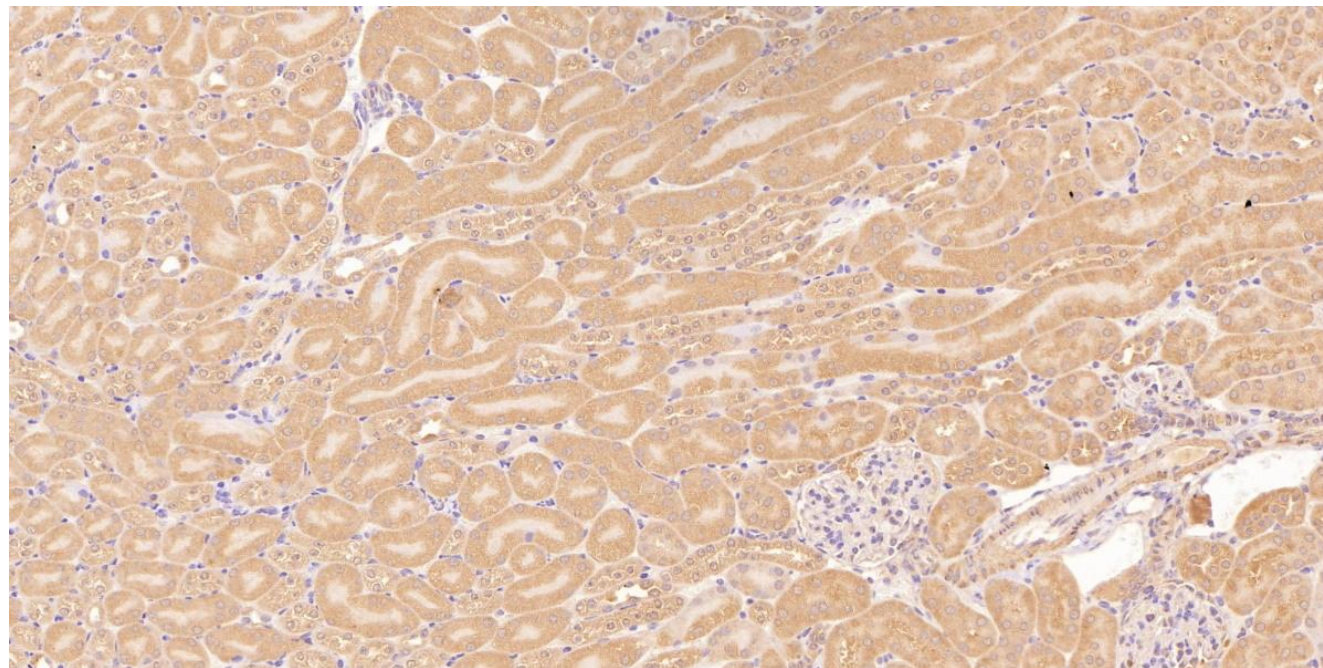

Fig 4 GRK LAME female

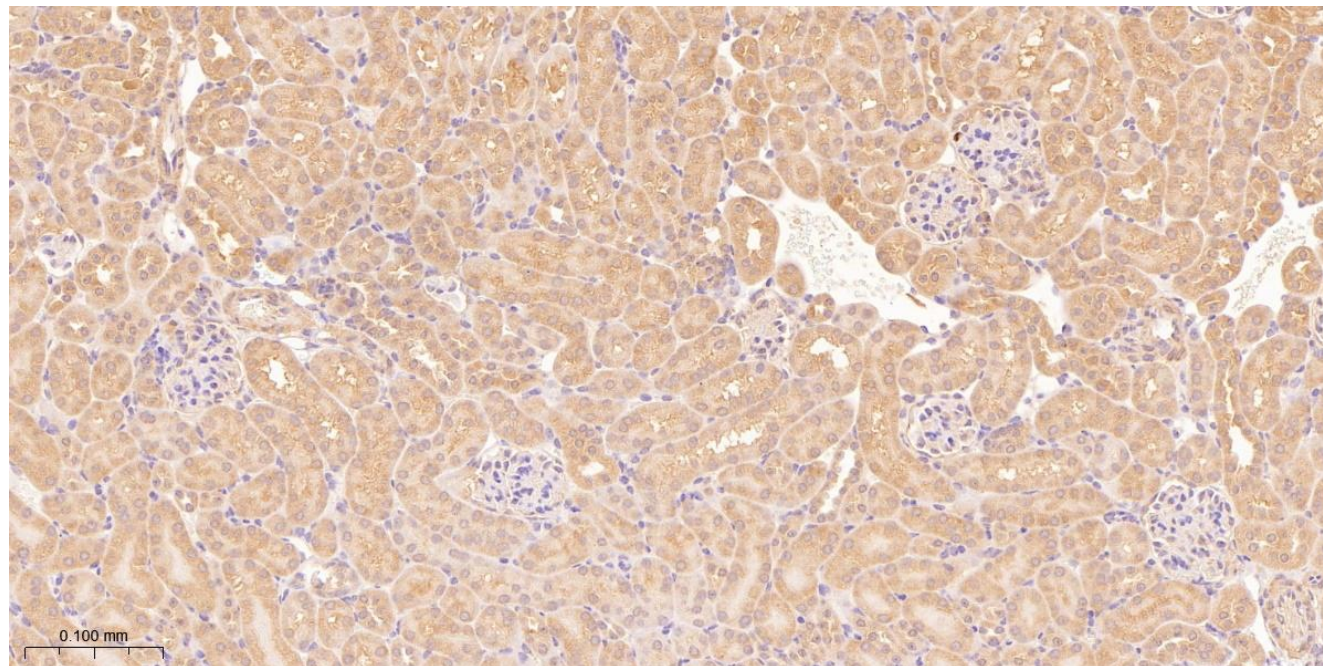



Fg 4 GRK LAME male

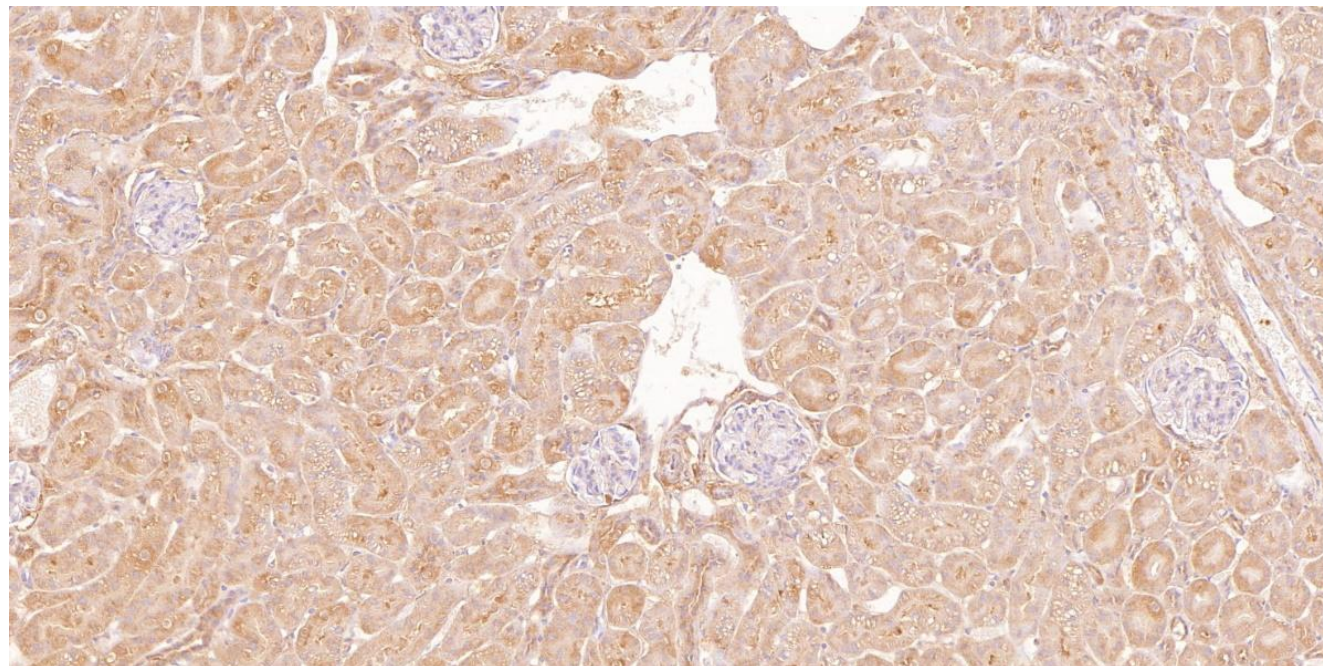

Fig 3 NCC control

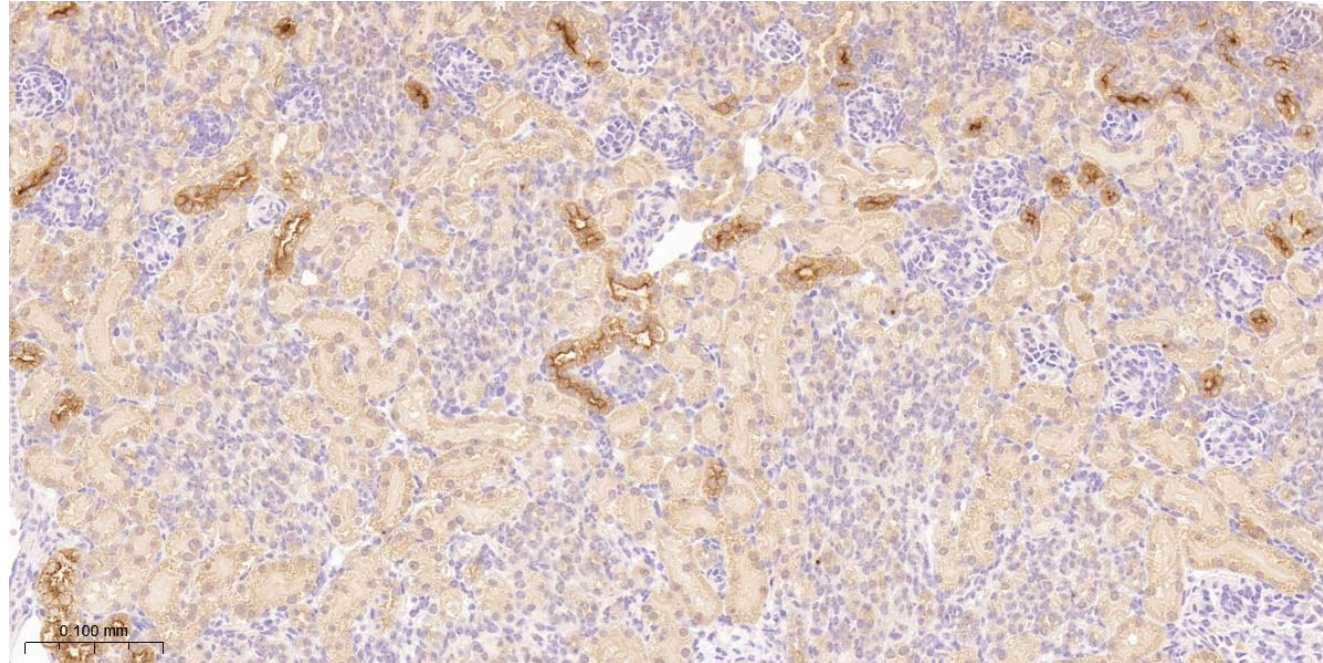

Fig 3 NCC LAME

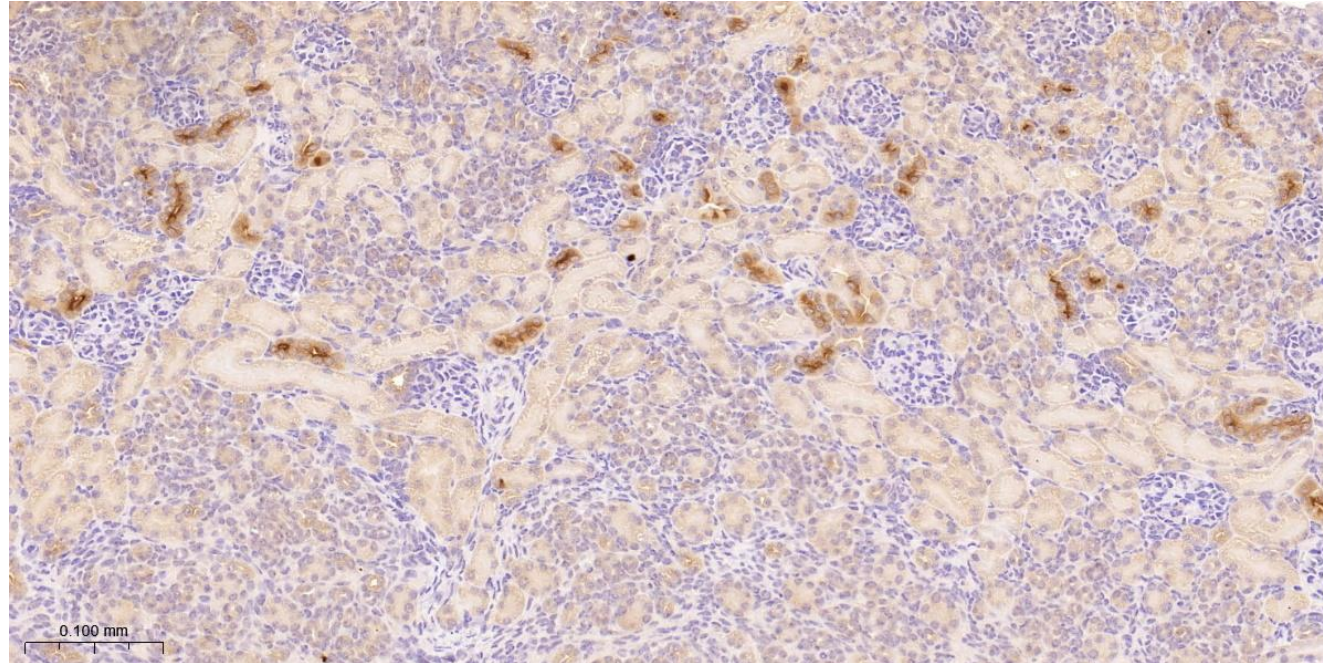

Fig 4 NCC control female

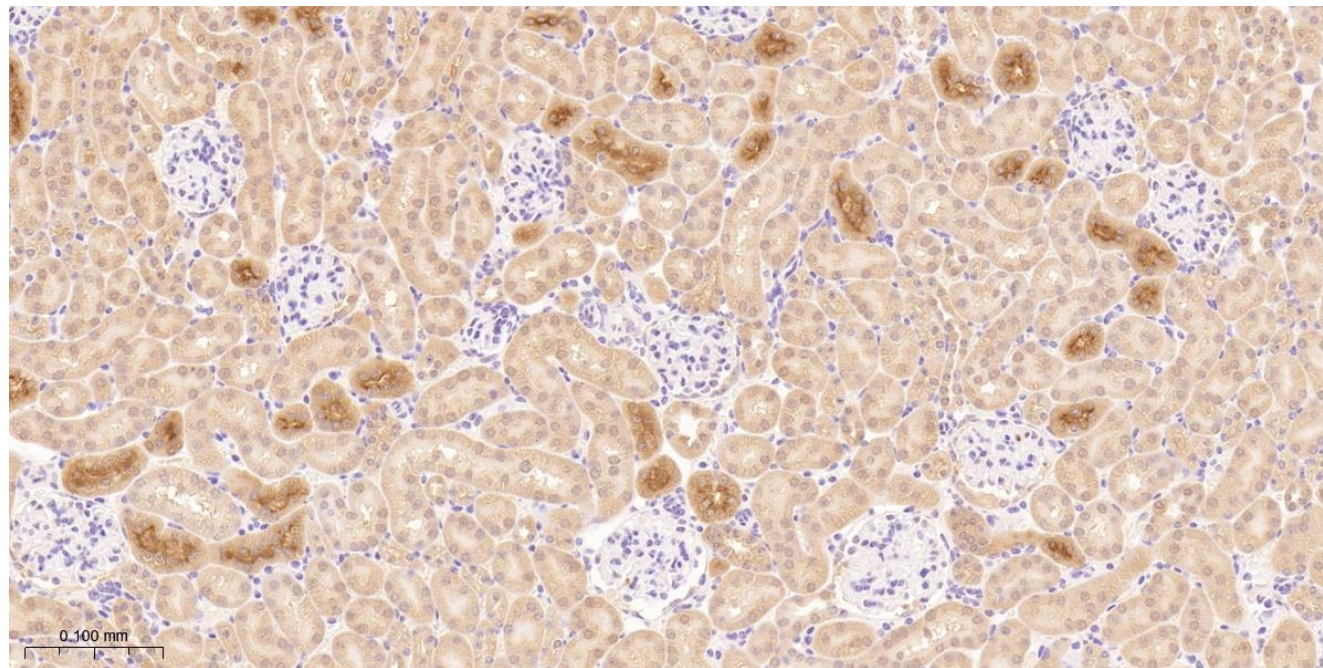

Fig 4 NCC control male

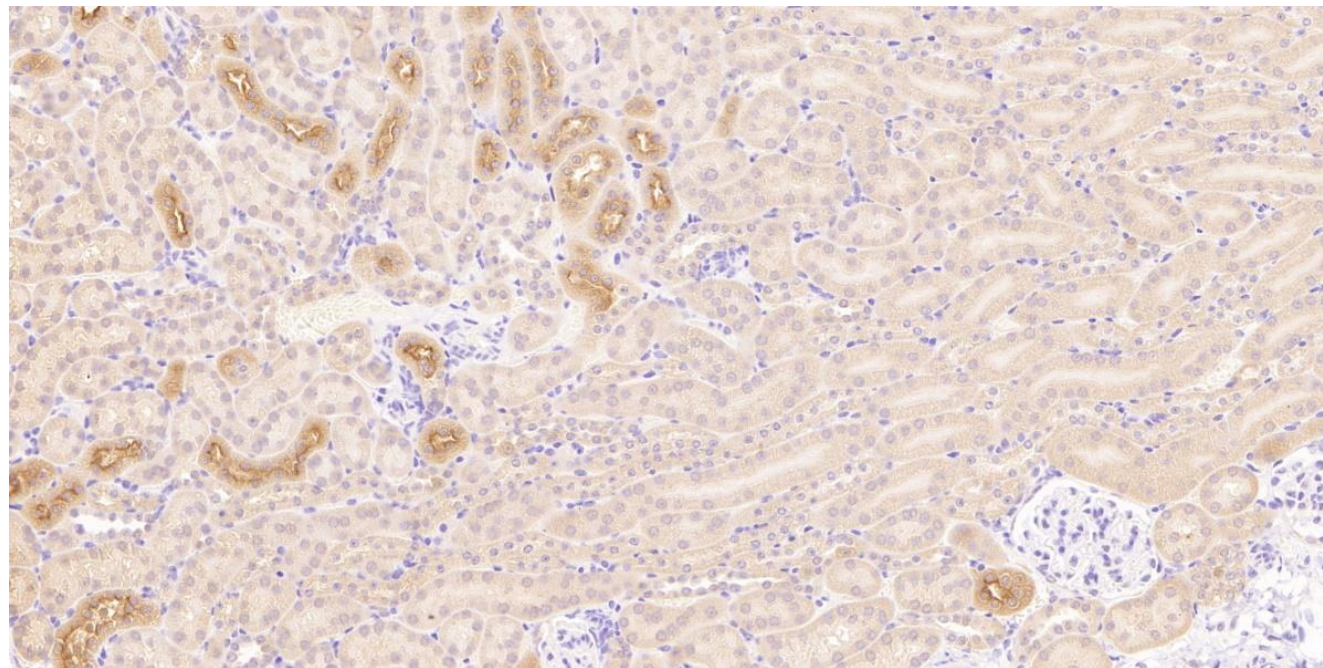

Fig 4 NCC LAME female

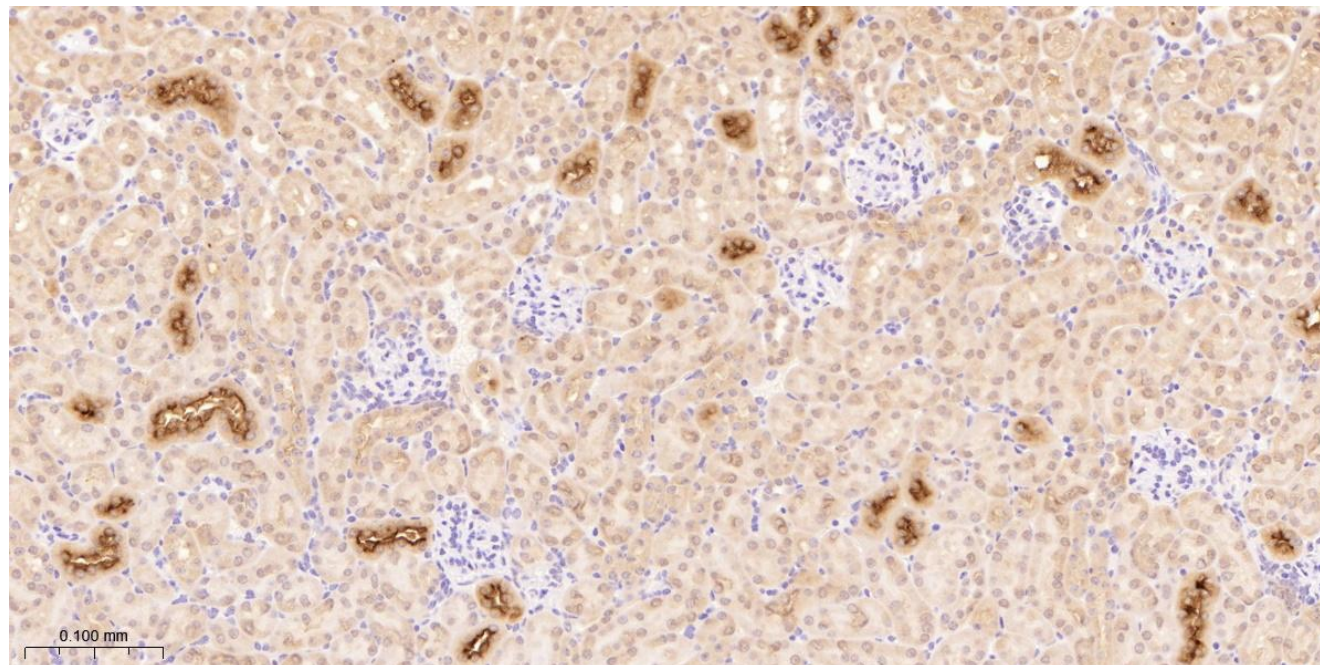

Fig 4 NCC LAME male

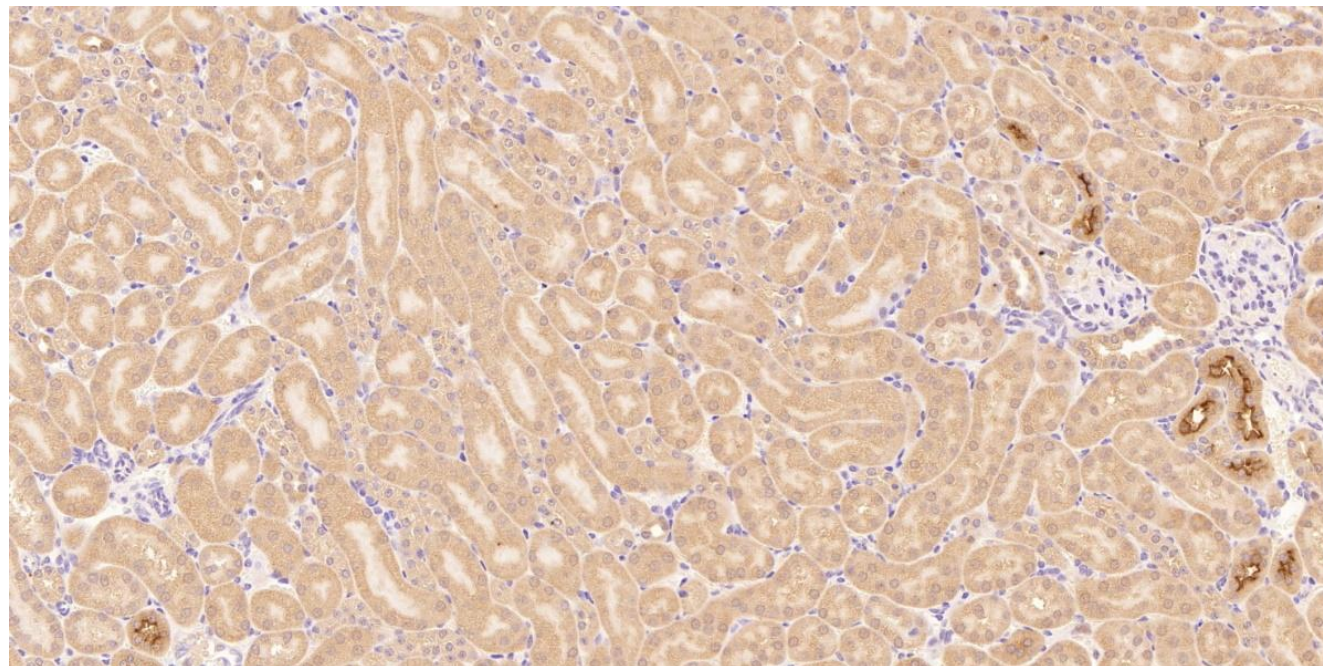

Fig 3B

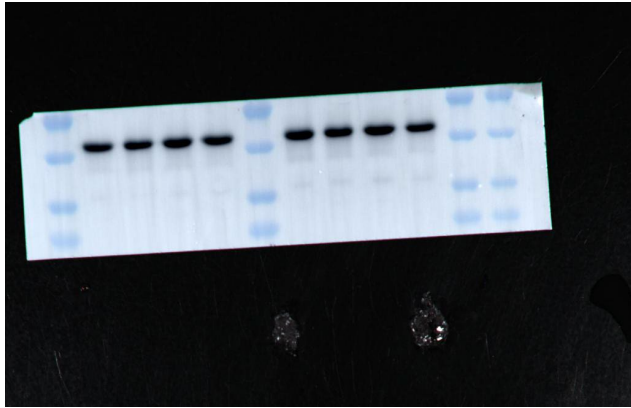

Actin

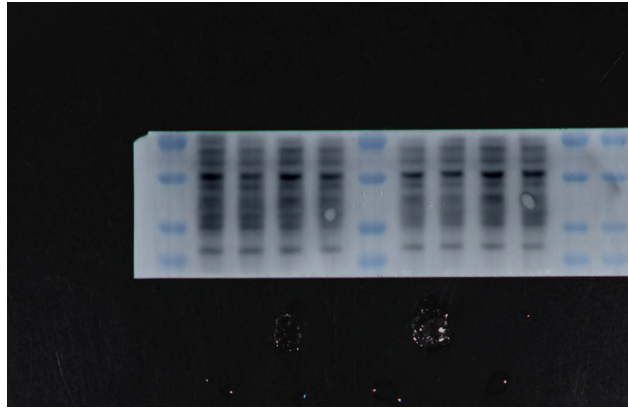

AQP2

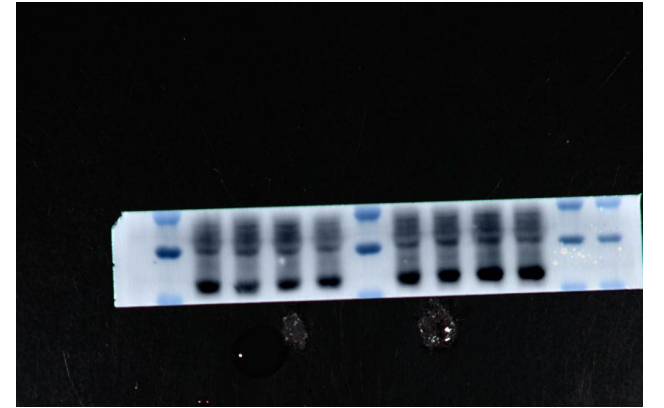

AT1R

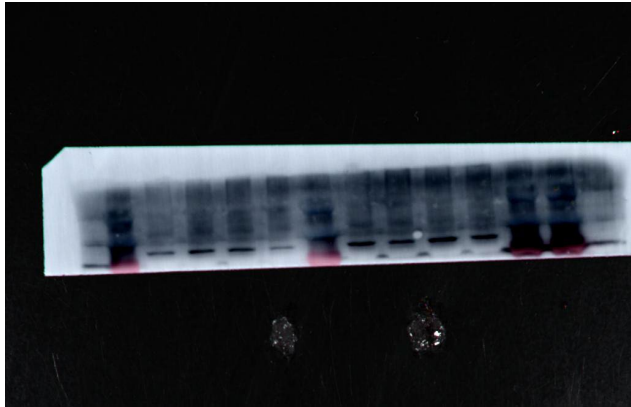

GRK4

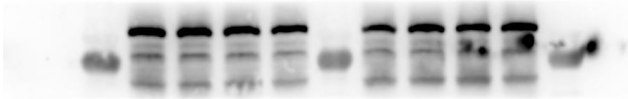

ENaC

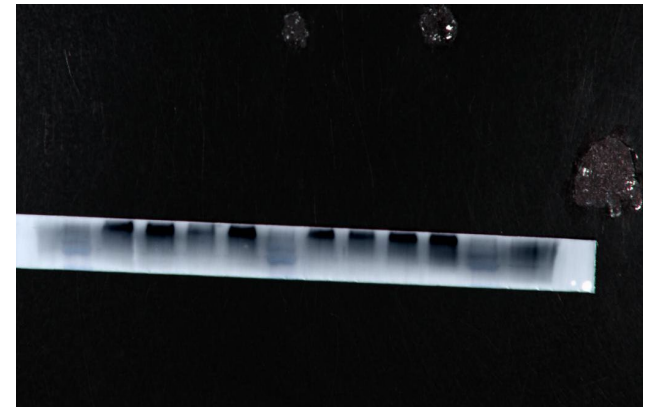

NCC



Figure 4B male

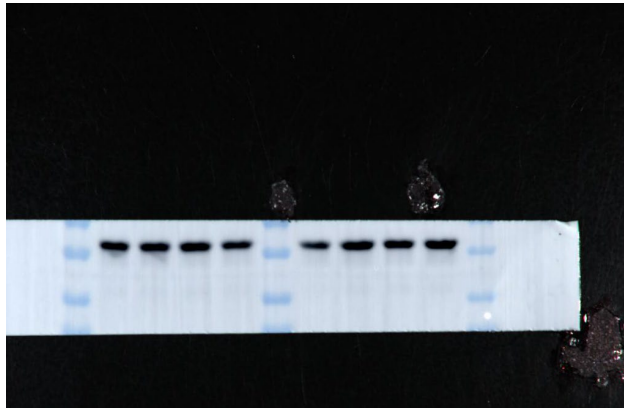

Actin

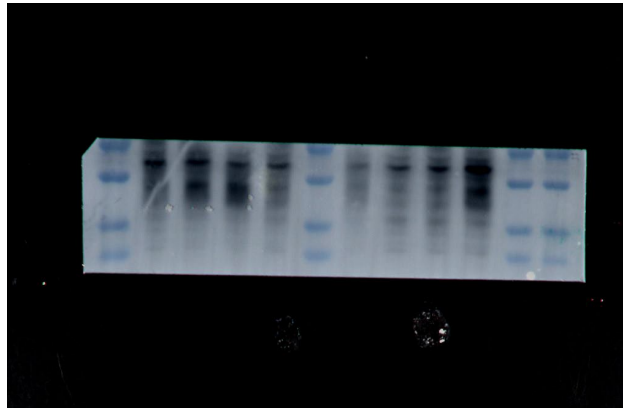

AQP2

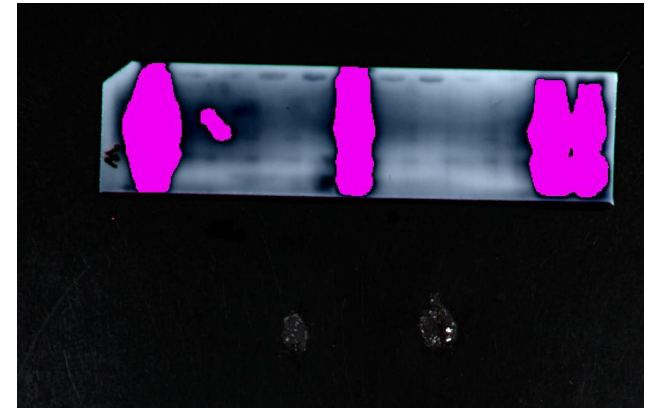

AT1R

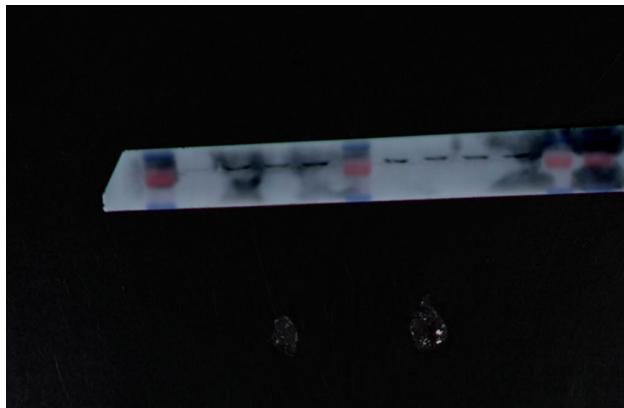

GRK4

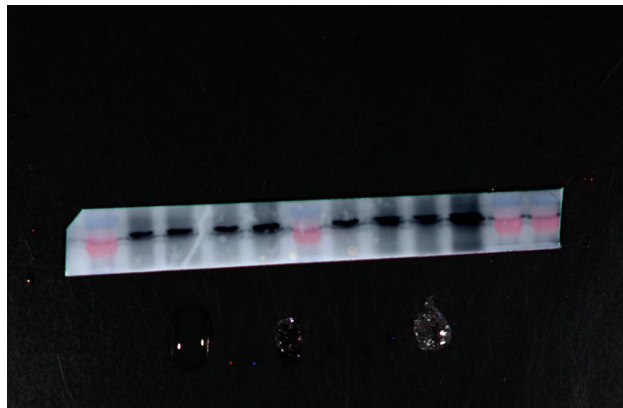

ENaC

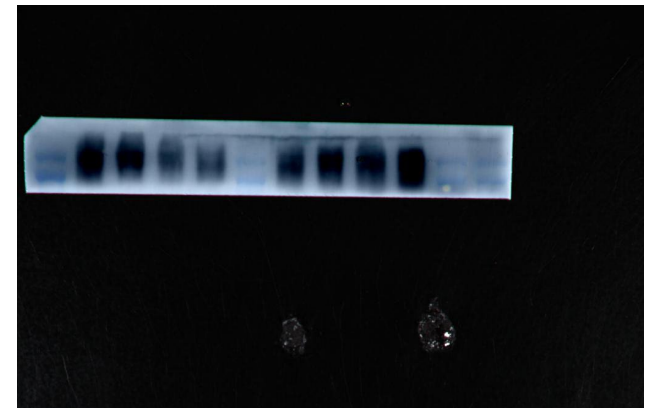

NCC

Figure 4B female

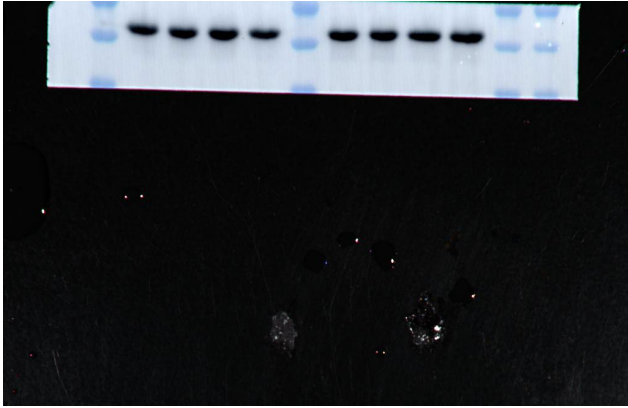

Actin

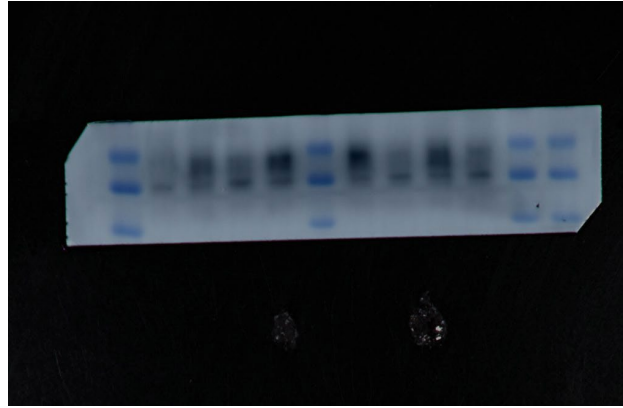

AQP2

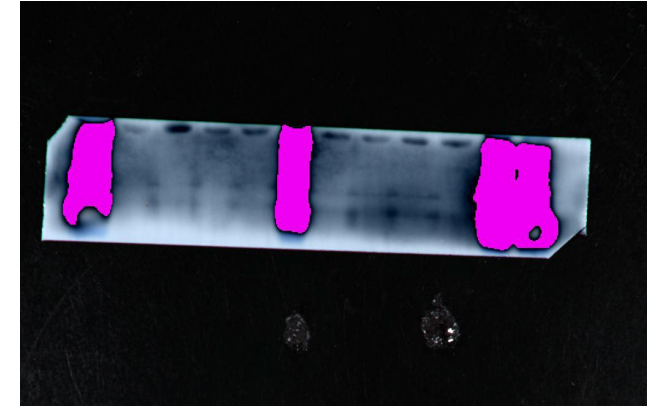

AT1R

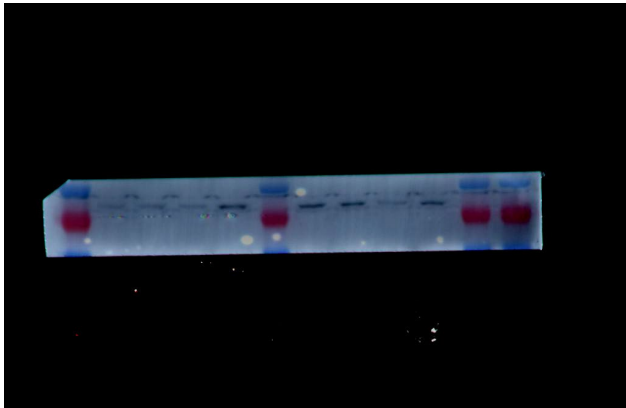

GRK4

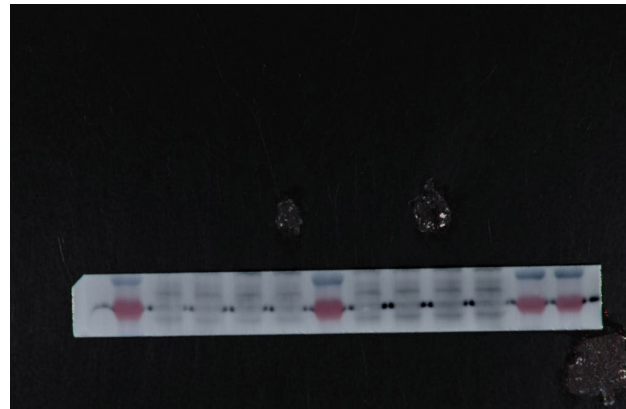

ENaC

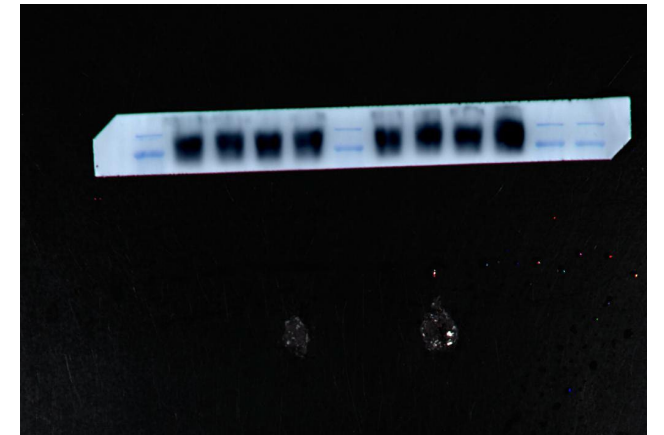

NCC
